# Supplementary material for: Water, Sanitation, and Hygiene Infrastructure and Resources in Schools in Belize during the COVID-19 Pandemic, 2021–2023
Source: MDPI journal article supplement (doi:10.3390/ijerph21040470), 2024-04-12
Supplement: s1 [file s1]

# National School WASH Survey

## School Information

**In this section, we will ask general questions about your school location and your role at the school.**

Today's date

---

What is the name of your school?

---

In which district is your school located?

- ☐ Corozal
- ☐ Orange Walk
- ☐ Belize
- ☐ Cayo
- ☐ Stann Creek
- ☐ Toledo

In which city, town, or village is your school located?

---

What kind of school do you work in?

- ☐ Primary
- ☐ Secondary
- ☐ Other

If other, please specify your school type.

---

What is your name?

---

What is your position in the school?

- ☐ Principal/administrator
- ☐ Teacher
- ☐ Other

If other, please specify your position at your school.

---

## School Demographics

**In this section, we will ask questions about your school structure and function.**

Total students enrolled in your school:

\_\_\_\_\_

Since March 2020, has your school reopened for face-to-face attendance?

- ☐ Yes  
☐ No

How many times has it been closed because of COVID-19?

- ☐ None  
☐ Once  
☐ Twice  
☐ More than two times

Is your school currently closed as a result of COVID-19?

- ☐ School is open  
☐ School is closed  
☐ Operating in hybrid mode

In the past two weeks, how many students on average attended face-to-face classes per day?

\_\_\_\_\_

In the past two weeks, how many students on average attended online classes or were learning remotely per day?

\_\_\_\_\_

How many students do you anticipate returning to the classroom when school reopens?

\_\_\_\_\_

How many students do you anticipate attending classes online or learning remotely when school reopens?

\_\_\_\_\_

How many teachers are currently teaching face-to-face?

\_\_\_\_\_

How many classrooms are there in your school (separated by a wall)?

\_\_\_\_\_

Does your school provide food to students through a school feeding program?

Select all that apply.

- ☐ Yes, students eat food cooked on-site  
☐ Yes, students eat food we purchase from an outside vendor  
☐ Yes, but students also have the option to bring food from home  
☐ No school food program. Students leave the campus to eat lunch  
☐ No school food program. Students bring food from home  
☐ Other

If other, please describe your school feeding program.

\_\_\_\_\_

---

Will your school provide food to students through a school feeding program when it reopens?

Select all that apply.

- ☐ Yes, students will eat food cooked on-site
- ☐ Yes, students will eat food we purchase from an outside vendor
- ☐ Yes, but students will also have the option to bring food from home
- ☐ No school food program. Students will leave the campus to eat lunch
- ☐ No school food program. Students will bring food from home
- ☐ Other

---

If other, please describe your school feeding program.

---

---

Where do students currently eat?

Select all that apply.

- ☐ Indoors in their classrooms
- ☐ Indoors in a school cafeteria or dining hall
- ☐ Outdoors
- ☐ At home or away from the school
- ☐ Other

---

If other, please specify where students eat.

---

---

Where will students eat when they return to the classroom?

Select all that apply.

- ☐ Indoors in their classrooms
- ☐ Indoors in a school cafeteria or dining hall
- ☐ Outdoors
- ☐ At home or away from the school
- ☐ Other

---

If other, please specify where students eat.

---

## Water Access

**In this section, we will ask questions about the school's main water source and restrooms.**

What is the main source of water of the school?

Select the one used most frequently.

- ☐ Piped
- ☐ Covered well/spring
- ☐ Open well/spring
- ☐ Manual hand pump
- ☐ Rainwater
- ☐ Purchased bottled water
- ☐ Tanker-truck or cart
- ☐ Lake/river/stream
- ☐ No water source
- ☐ Other
- ☐ Don't know

If other, please specify the main source of water at the school.

\_\_\_\_\_

Where do you access the main water source for this school?

- ☐ On school ground
- ☐ Off school ground

How long does it take to go to the main source, collect water, and return?

- ☐ Less than an hour
- ☐ 1-2 hours
- ☐ More than 2 hours

Are there ever times when water is not available at this source?

- ☐ Yes
- ☐ No
- ☐ Don't know

What are the reasons that water is sometimes not available?

Select all that apply.

- ☐ Temporary / daily shortage (low water table, etc.)
- ☐ Locked / restricted access
- ☐ Power outages
- ☐ Seasonal shortage
- ☐ Inability to pay / too expensive
- ☐ Mechanical breakdown
- ☐ Other

If other, please specify why water is sometimes not available.

\_\_\_\_\_

Are there ever concerns about the quality or cleanliness of water at the school?

- ☐ Yes
- ☐ No

What is the concern about the water?

Select all that apply.

- ☐ Color of water
- ☐ Smell of water
- ☐ Taste of water
- ☐ Contamination of water source
- ☐ Other

If other, please specify your concern about the water.

\_\_\_\_\_

---

What is the source of water for handwashing?

Select all that apply.

- ☐ Piped
- ☐ Covered well/spring
- ☐ Open well/spring
- ☐ Manual hand pump
- ☐ Rainwater
- ☐ Purchased bottled water
- ☐ Tanker-truck or cart
- ☐ Lake/river/stream
- ☐ No water source
- ☐ Other
- ☐ Don't know

---

If other, please specify the water source for handwashing.

---

---

Is there drinking water at the school?

- ☐ Yes
- ☐ No

---

What is the source of drinking water?

Select all that apply.

- ☐ Piped
- ☐ Covered well/spring
- ☐ Open well/spring
- ☐ Manual hand pump
- ☐ Rain water
- ☐ Purchased bottled water
- ☐ Tanker-truck or cart
- ☐ Lake/river/stream
- ☐ Other
- ☐ Don't know

---

If other, please specify the drinking water source.

---

---

Why is there no drinking water available at school?

Select all that apply.

- ☐ Concerns about quality of water
- ☐ Distance to water source too far
- ☐ Water sometimes not available at source (broken, seasonal shortage, etc.)
- ☐ No time to collect water
- ☐ No containers for water
- ☐ Water containers were broken or stolen
- ☐ No teacher to take responsibility
- ☐ No students to take responsibility
- ☐ No funds / not affordable
- ☐ Other

---

If other, please specify why there is no drinking water at the school.

---

---

How many restrooms are on the school grounds?

---

---

Are the restrooms separated by sex?

- ☐ Yes
- ☐ No

---

How many toilets/latrines are on the school grounds?

---

---

What type of toilets/latrines are at the school?

Select the most common option.

- ☐ Flush/pour-flush toilet
- ☐ Pit latrines with slab
- ☐ Pit latrines without slab
- ☐ Other

---

If other, please specify what type of toilet/latrine is available at your school.

---

## Hand Hygiene

**In this section, we will ask questions about handwashing and hand sanitizer stations at your school.**

Does the school have handwashing stations?

- ☐ Yes  
☐ No

How many handwashing stations are there in total?

\_\_\_\_\_

How many handwashing stations are not functioning?

\_\_\_\_\_

Where are these handwashing stations located?

Select all that apply.

- ☐ At or near the entrance of the school  
☐ Restrooms  
☐ Food preparation area  
☐ Food consumption area  
☐ Classroom  
☐ School yard  
☐ Other

If other, please specify where the handwashing stations are located.

\_\_\_\_\_

What type of handwashing stations are available?

Select all that apply.

- ☐ Fixed sink with water faucet  
☐ A barrel or container with a spicket/tap  
☐ A container  
☐ A pila/basin  
☐ Other

If other, please specify the type of handwashing station available.

\_\_\_\_\_

Does the school have soap for handwashing?

- ☐ Yes, sometimes  
☐ Yes, always  
☐ No, never

How many handwashing stations currently have soap?

\_\_\_\_\_

Why does the school not have soap for handwashing?

Select all that apply.

- ☐ No funds  
☐ Soap is too expensive  
☐ Soap gets used up too quickly  
☐ Soap gets stolen  
☐ Only provided when water is available  
☐ Other

If other, please specify why the school does not have soap for handwashing.

\_\_\_\_\_

Does the school have hand sanitizer available to students?

- ☐ Yes, sometimes  
☐ Yes, always  
☐ No, never

---

Why does the school not have hand sanitizer?

- ☐ No dispensers
- ☐ Dispensers are broken or stolen
- ☐ No time to fill dispensers
- ☐ No one to take responsibility
- ☐ Not affordable
- ☐ Not needed
- ☐ Other

---

If other, please specify why does the school not have hand sanitizer.

---

---

How many hand sanitizer dispensers are at the school (including bottle dispensers)?

---

---

How many hand sanitizer dispensers are not functioning?

---

---

What type of dispensers are used?

Select all that apply.

- ☐ Fixed dispenser to the wall that is battery operated/automated with hand sensors
- ☐ Fixed dispenser to the wall that you push to dispense
- ☐ Plastic bottle or container with pump
- ☐ Spray bottle
- ☐ Foot lever system
- ☐ Other

---

If other, please specify the type of dispensers.

---

---

Where are the hand sanitizer stations located?

Select all that apply.

- ☐ At the entrance of the school
- ☐ Next to the bathrooms
- ☐ In the hallways
- ☐ In the classrooms
- ☐ At classroom entrances
- ☐ In the cafeteria or dining hall
- ☐ Staff lounge
- ☐ Other

---

If other, please specify where the hand sanitizer stations are located.

---

---

Who provides the hand sanitizer to the school?

Select all that apply.

- ☐ Government of Belize
- ☐ Teachers
- ☐ Parents
- ☐ Non-profit organizations
- ☐ Other
- ☐ Don't know

---

If other, please specify who provides the hand sanitizer to the school.

---

---

Is the amount of hand sanitizer provided sufficient?

- ☐ Yes
- ☐ No
- ☐ Don't know



## School Management of Hygiene Services

**In this section, we will ask questions about expenses and funding for school reopening.**

What specific areas have funds been spent in order to have the school qualified to safely reopen during COVID-19? (HWS = handwashing station)

Select all that apply.

- ☐ Water or water delivery
- ☐ Adding new HWS
- ☐ Repairs of HWS
- ☐ Soap for handwashing
- ☐ Cleaning supplies (mops, brooms, detergent, etc.)
- ☐ Purchasing or repairing water containers
- ☐ Building, purchasing or repairing container stands
- ☐ Repairs of restrooms/toilets
- ☐ Construction of restrooms/toilets
- ☐ Purchasing hand sanitizer
- ☐ Purchasing dispensers for hand sanitizer
- ☐ Purchasing toilet paper
- ☐ Training materials for teachers
- ☐ Educational materials for students and families
- ☐ Signs and posters about hand hygiene
- ☐ No funds were spent
- ☐ Other

If other, please specify areas where funds have been spent for school reopening.

Where did the funds come from?

Select all that apply.

- ☐ Government of Belize
- ☐ Donation from parents
- ☐ Donation from teachers
- ☐ Donations from non-profits
- ☐ Donations from religious organizations
- ☐ Other
- ☐ Don't know

If other, please specify where the funds came from.

Which organization(s)?

In addition to funds, what other type of assistance did the school receive from the above organization(s)?

Select all that apply.

- ☐ None
- ☐ Donation of handwashing stations
- ☐ Donation of soap
- ☐ Donation of hand sanitizer
- ☐ Training materials for teachers
- ☐ Educational materials for students and families
- ☐ Signs and posters about hand hygiene
- ☐ Other

If other, please specify type of assistance.

# Facility Assessment: Water Access Point

Please complete the form below for each water access point at the school.

Location of assessment

- ☐ Entrance
- ☐ Hallway
- ☐ Classroom
- ☐ Bathroom
- ☐ Dining area
- ☐ Staff room
- ☐ Other

If other, please specify location of assessment.

What type of water access point is this?

- ☐ Pipe tap
- ☐ Portable container (bucket, jerrycan, etc.)
- ☐ Stationary container (cement tank, plastic drums, etc.)
- ☐ Other water source (borehole, well, etc.)
- ☐ Pila
- ☐ Drinking fountain
- ☐ Other

If other, please specify type of water access point.

What is this water point used for?

Select all that apply.

- ☐ Drinking
- ☐ Handwashing
- ☐ Flushing toilets
- ☐ Cleaning
- ☐ Other

If other, please specify what the water point is used for.

Is this water source for students or staff?

- ☐ Students
- ☐ Staff
- ☐ Both students and staff

Is there a lid in place?

- ☐ Yes
- ☐ No
- ☐ Not applicable

Is there a tap?

- ☐ Yes
- ☐ No

Is the tap functional?

Please use source to verify.

- ☐ Yes
- ☐ No
- ☐ Cannot assess (no water)

Is the water point leaking or broken?

- ☐ Yes
- ☐ No
- ☐ Cannot assess (no water)

Is water available for use right now?

- ☐ Yes
- ☐ No

---

Is soap available? ☐ Yes  
☐ No

---

Is paper towel available? ☐ Yes  
☐ No

---

Is this DRINKING WATER access point accessible by people with disabilities? ☐ Yes  
☐ No

1. Accessible via a clear path without stairs or steps that is free of obstructions
  2. Can be reached from a seated position
  3. The water source/dispenser can be used with minimal effort with one closed fist or feet
- 

Is this DRINKING WATER access point accessible by the smallest children in the school? ☐ Yes  
☐ No

1. Can be reached by a small child
  2. The water source/dispenser can be used by small children
- 

Is this HANDWASHING access point accessible by people with disabilities? ☐ Yes  
☐ No

1. Accessible via a clear path without stairs or steps that is free of obstructions
  2. Can be reached from a seated position
  3. The water source/dispenser can be opened/closed with minimal effort with one closed fist or feet
- 

Is this HANDWASHING access point that can be accessed by the smallest children in the school? ☐ Yes  
☐ No

1. Can be reached by a small child
2. The water source/dispenser can be opened/closed by small children

# Facility Assessment: Alcohol-Based Hand Rub

Please complete the form below for each hand sanitizer dispenser (including spray bottles) at the school.

Date

Location of assessment

- ☐ School entrance
- ☐ Hallway
- ☐ Inside classroom
- ☐ Classroom entrance
- ☐ Bathroom
- ☐ Dining area
- ☐ Staff room
- ☐ Other

If other, please specify location of assessment.

What type of dispenser is this?

- ☐ Spray bottle
- ☐ Pump top bottle
- ☐ Push-style
- ☐ Automatic
- ☐ Foot pedal
- ☐ Other

If other, please specify dispenser type.

How is the dispenser stationed?

- ☐ No fixed location (countertop, tables, etc.)
- ☐ Fixed location (wall)
- ☐ Self-standing (floor)
- ☐ Other

If other, please specify how the dispenser is stationed.

What is the volume of the dispenser (in mL)?

- ☐ Less than 500 mL
- ☐ About or greater than 500mL

Is there currently alcohol handrub in the dispenser?

Please use the dispenser to verify.

- ☐ Yes
- ☐ No
- ☐ Cannot observe dispenser closely to assess alcohol presence
- ☐ Dispenser is broken so cannot assess alcohol presence

How often is the dispenser empty?

- ☐ Rarely
- ☐ Sometimes
- ☐ Always
- ☐ Do not know

Is the dispenser broken?

Please use the dispenser to verify.

- ☐ Yes
- ☐ No
- ☐ Cannot test to verify

---

How long has the dispenser been broken?

- ☐ Less than a week
- ☐ More than a week but less than a month
- ☐ More than a month
- ☐ Do not know

---

Is the dispenser refillable or does it use replacement cartridges?

- ☐ Refillable
- ☐ Replace container
- ☐ Other
- ☐ Do not know

---

If other, please specify.

---

---

How many times per month is this dispenser typically refilled?

- ☐ 10 or more times per month (every few days)
- ☐ 5-9 times per month
- ☐ 1-4 times per month
- ☐ Less than 1 time per month Have
- ☐ never refilled
- ☐ Do not know

# Facility Assessment: Restrooms

Please complete the form below. Only one form per school.

A restroom is defined as a room that contains one or more toilets/latrines/stalls. If the male and female sides are completely separated by a wall (each with one or more toilets/latrines/stalls inside) then we will count the male side as one restroom and female side as another restroom (2 total).

|    |                                             |  |
|----|---------------------------------------------|--|
| 1) | Date                                        |  |
| 2) | How many restrooms are there?               |  |
| 3) | How many restrooms are for male students?   |  |
| 4) | How many restrooms are for female students? |  |
| 5) | How many restrooms are for staff?           |  |

For the next two questions, the handwashing station or hand sanitizer dispenser can be inside the restroom or within 5 meters of the restroom.

|    |                                                                               |  |
|----|-------------------------------------------------------------------------------|--|
| 6) | How many of the restrooms have a handwashing station with water?              |  |
| 7) | How many of the restrooms have a handwashing station with water and soap?     |  |
| 8) | How many of the restrooms have a functional hand sanitizer dispenser outside? |  |
