# Supplementary material for: Water, Sanitation, and Hygiene Infrastructure and Resources in Schools in Belize during the COVID-19 Pandemic, 2021–2023
Source: MDPI journal article supplement (doi:10.3390/ijerph21040470), 2024-04-12
Supplement: s1 [file s1]

**Table S1.** Hand hygiene infrastructure at 11 pilot schools at baseline and follow-up\*.

|                                                                                           | Baseline  | Follow-up | Percent change | P-value          |
|-------------------------------------------------------------------------------------------|-----------|-----------|----------------|------------------|
| <b>Handwashing station</b>                                                                |           |           |                |                  |
| <b>Total handwashing access points</b>                                                    | 146       | 142       | -              | -                |
| <b>Functional handwashing access points**</b>                                             | 131 (90%) | 114 (80%) | -10%           | <b>0.025</b>     |
| Functional handwashing access points with soap, n (%)†                                    | 94 (72%)  | 83 (73%)  | +1%            | 0.855            |
| Functional handwashing access points with paper towel, n (%)†                             | 50 (38%)  | 50 (44%)  | +6%            | 0.366            |
| Functional handwashing access points accessible for individuals with disabilities, n (%)† | 72 (55%)  | 50 (44%)  | -11%           | 0.083            |
| Functional handwashing access points accessible for small children, n (%)†                | 108 (82%) | 63 (55%)  | -27%           | <b>&lt;0.001</b> |
| <b>ABHR</b>                                                                               |           |           |                |                  |
| <b>Total ABHR dispensers</b>                                                              | 106       | 94        |                |                  |
| Functional ABHR dispensers                                                                | 102 (96%) | 79 (84%)  | -12%           | <b>0.003</b>     |
| <b>Restrooms</b>                                                                          |           |           |                |                  |
| <b>Total restrooms</b>                                                                    | 52        | 53        |                |                  |
| Restrooms with handwashing station with water within 5 meters, n (%)                      | 45 (87%)  | 39 (74%)  | -13%           | 0.097            |
| Restrooms with handwashing station with water and soap within 5 meters, n (%)             | 34 (65%)  | 35 (66%)  | +1%            | 0.944            |

ABHR = alcohol-based hand rub

\*Excluded one school that was not operating in normal conditions at follow-up

\*\*Percent of all handwashing access points

†Percent of all functional handwashing access points
